# Supplementary material for: Infections of virulent and avirulent viruses differentially influenced the expression of dicer-1, ago-1, and microRNAs in Bombus terrestris
Source: PubMed Central journal article supplement (PMC5379481; doi:10.1038/srep45620), 2017-04-04

## Title

# Infections of virulent and avirulent viruses differentially influenced the expression of *dicer-1*, *ago-1*, and microRNAs in *Bombus terrestris*

Jinzhi Niu<sup>1,2</sup>, Ivan Meeus<sup>2</sup>, Dieter IM De Coninck<sup>3</sup>, Dieter Deforce<sup>3</sup>, Kayvan Etebari<sup>4</sup>, Sassan Asgari<sup>4</sup>, Guy Smagghe<sup>1,2,\*</sup>

<sup>1</sup>Key Laboratory of Entomology and Pest Control Engineering, College of Plant Protection, Southwest University, Chongqing 400716, China

<sup>2</sup>Department of Crop Protection, Faculty of Bioscience Engineering, Ghent University, Coupure Links 653, B-9000 Ghent, Belgium

<sup>3</sup>Laboratory for Pharmaceutical Biotechnology, Faculty of Pharmaceutical Sciences, Ghent University, Ottergemsesteenweg 460, B-9000 Ghent, Belgium.

<sup>4</sup>Australian Infectious Disease Research Centre, School of Biological Sciences, The University of Queensland, Brisbane, QLD 4072, Australia

\*Corresponding author: [guy.smagghe@ugent.be](mailto:guy.smagghe@ugent.be)

**Supplementary data**

**Table S1: p value of non-parametric test for all data sets by Mann-Whitney U**

| comparison factor                          | expression level |              |            |          |       |
|--------------------------------------------|------------------|--------------|------------|----------|-------|
|                                            | <i>dicer-1</i>   | <i>ago-1</i> | bt-miR-13b | bt-mc-24 | SBPV  |
| IAPV vs. control at 8h                     | 0.200            | 0.029        | 0.400      | 1.000    |       |
| IAPV vs. control at 24h                    | 0.886            | 0.886        | 0.400      | 0.100    |       |
| IAPV vs. control at 48h                    | 0.686            | 0.886        | 1.000      | 0.400    |       |
| IAPV vs. control at 72 h                   | 0.229            | 0.114        | 0.400      | 0.400    |       |
| SBPV vs. control at 8h                     | 0.200            | 0.886        | 1.000      | 0.200    |       |
| SBPV vs. control at 24h                    | 0.686            | 0.343        | 0.200      | 0.700    |       |
| SBPV vs. control at 48h                    | 0.004            | 0.004        | 0.200      | 0.050    |       |
| SBPV vs. control at 72 h                   | 0.200            | 0.343        | 0.050      | 1.000    |       |
| SBPV vs. control at 7 days                 | 0.886            | 1.000        |            |          |       |
| SBPV vs. control at 13 days                | 0.114            | 0.686        |            |          |       |
| dsDicer-1 vs. dsGFP                        | 0.008            |              |            |          |       |
| dsDicer-1 vs. dsGFP (upon viral infection) |                  |              |            |          | 0.525 |

**Table S2: data of miRNAs expression (IAPV infection samples vs. Control)**

| miRNA         | Average counts        |                      | AveExpr   | log2(IAPV/PBS) | F        | P.Value | adj.P.Val | fold   |
|---------------|-----------------------|----------------------|-----------|----------------|----------|---------|-----------|--------|
|               | IAPV infected samples | PBS injected samples |           |                |          |         |           |        |
| bte-miR-996   | 0.6563                | 0.0000               | 0.3281    |                | 1.4729   | 0.2970  | 0.3377    |        |
| bte-miR-980   | 0.2500                | 0.0000               | 0.1250    |                | 0.2317   | 0.7995  | 0.8281    |        |
| bte-miR-219   | 0.2188                | 0.0000               | 0.1094    |                | 0.1637   | 0.8524  | 0.8751    |        |
| bte-miR-307   | 1.5000                | 0.4063               | 0.9531    | 1.8845         | 4.2392   | 0.0665  | 0.0849    | 3.6923 |
| bte-miR-7     | 3.0938                | 0.9375               | 2.0156    | 1.7225         | 4.1205   | 0.0700  | 0.0883    | 3.3000 |
| bte-miR-124   | 11.5625               | 4.7188               | 8.1406    | 1.2930         | 2.7421   | 0.1371  | 0.1657    | 2.4503 |
| bte-miR-3791  | 118.6250              | 57.1250              | 87.8750   | 1.0542         | 11.4036  | 0.0075  | 0.0122    | 2.0766 |
| bte-let-7     | 127.6563              | 63.8125              | 95.7344   | 1.0004         | 3.4492   | 0.0955  | 0.1172    | 2.0005 |
| bte-miR-932   | 0.5938                | 0.3125               | 0.4531    | 0.9260         | 0.8197   | 0.4815  | 0.5220    | 1.9000 |
| bte-miR-137   | 6.8438                | 3.7500               | 5.2969    | 0.8679         | 17.3189  | 0.0025  | 0.0046    | 1.8250 |
| bte-miR-6000a | 26.7813               | 15.6250              | 21.2031   | 0.7774         | 28.3013  | 0.0006  | 0.0015    | 1.7140 |
| bte-miR-2765  | 2.3438                | 1.5000               | 1.9219    | 0.6439         | 4.2349   | 0.0666  | 0.0849    | 1.5625 |
| bte-mc-485    | 27.6875               | 18.5938              | 23.1406   | 0.5744         | 22.9077  | 0.0012  | 0.0023    | 1.4891 |
| bte-mc-295    | 11.9063               | 8.0625               | 9.9844    | 0.5624         | 51.2601  | 0.0001  | 0.0003    | 1.4767 |
| bte-miR-277   | 2105.4375             | 1448.6250            | 1777.0313 | 0.5394         | 162.6287 | 0.0000  | 0.0000    | 1.4534 |
| bte-miR-190   | 28.1250               | 19.5000              | 23.8125   | 0.5284         | 42.9930  | 0.0002  | 0.0005    | 1.4423 |
| bte-miR-263a  | 845.9375              | 597.4063             | 721.6719  | 0.5018         | 37.6277  | 0.0003  | 0.0007    | 1.4160 |
| bte-miR-3719  | 0.9063                | 0.6563               | 0.7813    | 0.4657         | 3.5169   | 0.0924  | 0.1153    | 1.3810 |
| bte-miR-993   | 12.0625               | 9.0313               | 10.5469   | 0.4175         | 14.7509  | 0.0039  | 0.0067    | 1.3356 |
| bte-mc-476    | 1.2500                | 0.9375               | 1.0938    | 0.4150         | 3.4393   | 0.0959  | 0.1172    | 1.3333 |
| bte-miR-305   | 392.4375              | 302.3125             | 347.3750  | 0.3764         | 37.7059  | 0.0003  | 0.0007    | 1.2981 |
| bte-miR-13a   | 124.6875              | 96.2188              | 110.4531  | 0.3739         | 61.5787  | 0.0001  | 0.0002    | 1.2959 |

|              |           |           |           |        |          |        |        |        |
|--------------|-----------|-----------|-----------|--------|----------|--------|--------|--------|
| bte-miR-282  | 0.9688    | 0.7500    | 0.8594    | 0.3692 | 2.3032   | 0.1755 | 0.2057 | 1.2917 |
| bte-bantam   | 160.3750  | 124.8438  | 142.6094  | 0.3613 | 309.1513 | 0.0000 | 0.0000 | 1.2846 |
| bte-miR-278  | 204.1250  | 159.1250  | 181.6250  | 0.3593 | 364.3783 | 0.0000 | 0.0000 | 1.2828 |
| bte-miR-375  | 381.5000  | 311.6563  | 346.5781  | 0.2917 | 51.4737  | 0.0001 | 0.0003 | 1.2241 |
| bte-mc-762   | 37.2500   | 32.0000   | 34.6250   | 0.2192 | 39.3845  | 0.0002 | 0.0007 | 1.1641 |
| bte-miR-2-2  | 90.1250   | 77.7188   | 83.9219   | 0.2137 | 94.3946  | 0.0000 | 0.0001 | 1.1596 |
| bte-miR-2-3  | 89.9375   | 78.3438   | 84.1406   | 0.1991 | 69.7584  | 0.0000 | 0.0002 | 1.1480 |
| bte-miR-10   | 4145.3750 | 3617.6250 | 3881.5000 | 0.1965 | 334.6406 | 0.0000 | 0.0000 | 1.1459 |
| bte-miR-133  | 681.3125  | 597.2188  | 639.2656  | 0.1901 | 119.6428 | 0.0000 | 0.0001 | 1.1408 |
| bte-miR-100  | 1473.9375 | 1299.9063 | 1386.9219 | 0.1813 | 280.3230 | 0.0000 | 0.0000 | 1.1339 |
| bte-miR-318  | 22.5000   | 19.9375   | 21.2188   | 0.1744 | 9.1180   | 0.0131 | 0.0194 | 1.1285 |
| bte-miR-281  | 671.6563  | 597.4063  | 634.5313  | 0.1690 | 137.0811 | 0.0000 | 0.0000 | 1.1243 |
| bte-miR-927a | 114.3750  | 102.5313  | 108.4531  | 0.1577 | 34.7117  | 0.0003 | 0.0009 | 1.1155 |
| bte-miR-2-1  | 69.7188   | 62.5938   | 66.1563   | 0.1555 | 48.5910  | 0.0001 | 0.0004 | 1.1138 |
| bte-miR-210  | 34.8125   | 31.4063   | 33.1094   | 0.1486 | 27.9729  | 0.0006 | 0.0015 | 1.1085 |
| bte-miR-3730 | 3.9688    | 3.6250    | 3.7969    | 0.1307 | 8.8018   | 0.0142 | 0.0209 | 1.0948 |
| bte-miR-279b | 11.4063   | 10.4375   | 10.9219   | 0.1280 | 5.6336   | 0.0382 | 0.0522 | 1.0928 |
| bte-miR-2796 | 363.3750  | 334.5625  | 348.9688  | 0.1192 | 30.3136  | 0.0005 | 0.0012 | 1.0861 |
| bte-miR-3785 | 759.6250  | 701.4375  | 730.5313  | 0.1150 | 77.6846  | 0.0000 | 0.0001 | 1.0830 |
| bte-miR-34   | 1218.7188 | 1140.5000 | 1179.6094 | 0.0957 | 101.5866 | 0.0000 | 0.0001 | 1.0686 |
| bte-miR-13b  | 77.4375   | 72.6875   | 75.0625   | 0.0913 | 54.7551  | 0.0001 | 0.0003 | 1.0653 |
| bte-miR-6001 | 1.5938    | 1.5000    | 1.5469    | 0.0875 | 7.5172   | 0.0205 | 0.0290 | 1.0625 |
| bte-miR-252b | 39.9063   | 37.8125   | 38.8594   | 0.0778 | 119.8155 | 0.0000 | 0.0001 | 1.0554 |
| bte-miR-14   | 3033.4688 | 2891.7500 | 2962.6094 | 0.0690 | 509.3730 | 0.0000 | 0.0000 | 1.0490 |
| bte-miR-306  | 171.0938  | 164.5938  | 167.8438  | 0.0559 | 191.1733 | 0.0000 | 0.0000 | 1.0395 |
| bte-mc-65    | 86.5000   | 83.7813   | 85.1406   | 0.0461 | 21.3543  | 0.0014 | 0.0028 | 1.0325 |

|               |           |           |           |         |          |        |        |        |
|---------------|-----------|-----------|-----------|---------|----------|--------|--------|--------|
| bte-miR-6037  | 10.2188   | 10.1563   | 10.1875   | 0.0089  | 8.5665   | 0.0152 | 0.0220 | 1.0062 |
| bte-miR-92b   | 291.6250  | 293.6875  | 292.6563  | -0.0102 | 170.1823 | 0.0000 | 0.0000 | 0.9930 |
| bte-miR-31a   | 136.4375  | 137.4688  | 136.9531  | -0.0109 | 90.1142  | 0.0000 | 0.0001 | 0.9925 |
| bte-miR-87    | 111.4375  | 112.7500  | 112.0938  | -0.0169 | 104.7013 | 0.0000 | 0.0001 | 0.9884 |
| bte-miR-1175  | 63.9063   | 64.8750   | 64.3906   | -0.0217 | 27.4430  | 0.0007 | 0.0015 | 0.9851 |
| bte-miR-3049  | 11.3750   | 11.5938   | 11.4844   | -0.0275 | 10.4090  | 0.0095 | 0.0145 | 0.9811 |
| bte-miR-3786  | 30.1563   | 30.7500   | 30.4531   | -0.0281 | 35.7992  | 0.0003 | 0.0008 | 0.9807 |
| bte-miR-275   | 836.9063  | 854.1250  | 845.5156  | -0.0294 | 152.3295 | 0.0000 | 0.0000 | 0.9798 |
| bte-miR-2788  | 10.4375   | 11.0938   | 10.7656   | -0.0880 | 38.2609  | 0.0003 | 0.0007 | 0.9408 |
| bte-miR-317   | 899.7500  | 962.6563  | 931.2031  | -0.0975 | 88.9165  | 0.0000 | 0.0001 | 0.9347 |
| bte-miR-316   | 146.0938  | 157.1563  | 151.6250  | -0.1053 | 26.7425  | 0.0007 | 0.0016 | 0.9296 |
| bte-miR-3718a | 1816.1875 | 1960.8125 | 1888.5000 | -0.1105 | 193.5426 | 0.0000 | 0.0000 | 0.9262 |
| bte-miR-29b   | 3.6875    | 4.0000    | 3.8438    | -0.1174 | 8.1374   | 0.0171 | 0.0245 | 0.9219 |
| bte-miR-6065  | 0.3438    | 0.3750    | 0.3594    | -0.1255 | 0.6417   | 0.5569 | 0.5981 | 0.9167 |
| bte-miR-184   | 2806.4375 | 3062.4375 | 2934.4375 | -0.1259 | 100.2293 | 0.0000 | 0.0001 | 0.9164 |
| bte-miR-276   | 3033.4688 | 3311.0938 | 3172.2813 | -0.1263 | 211.2123 | 0.0000 | 0.0000 | 0.9162 |
| bte-miR-9a    | 143.9063  | 158.0313  | 150.9688  | -0.1351 | 116.2396 | 0.0000 | 0.0001 | 0.9106 |
| bte-miR-79    | 4.5625    | 5.0938    | 4.8281    | -0.1589 | 13.4976  | 0.0049 | 0.0083 | 0.8957 |
| bte-mc-314    | 10.0938   | 11.3125   | 10.7031   | -0.1645 | 17.2568  | 0.0025 | 0.0046 | 0.8923 |
| bte-mc-1030   | 1376.1875 | 1543.0938 | 1459.6406 | -0.1651 | 12.6400  | 0.0058 | 0.0096 | 0.8918 |
| bte-miR-3726  | 7.7813    | 8.7813    | 8.2813    | -0.1744 | 4.7295   | 0.0541 | 0.0706 | 0.8861 |
| bte-miR-71    | 22.6250   | 25.8438   | 24.2344   | -0.1919 | 34.9020  | 0.0003 | 0.0009 | 0.8755 |
| bte-miR-8     | 694.8750  | 810.1875  | 752.5313  | -0.2215 | 445.6668 | 0.0000 | 0.0000 | 0.8577 |
| bte-miR-125   | 242.8438  | 284.0000  | 263.4219  | -0.2259 | 79.4006  | 0.0000 | 0.0001 | 0.8551 |
| bte-mc-732    | 1.0938    | 1.2813    | 1.1875    | -0.2283 | 5.1930   | 0.0451 | 0.0608 | 0.8537 |

|              |          |           |           |         |          |        |        |        |
|--------------|----------|-----------|-----------|---------|----------|--------|--------|--------|
| bte-miR-12   | 91.0625  | 106.8125  | 98.9375   | -0.2302 | 243.5173 | 0.0000 | 0.0000 | 0.8525 |
| bte-miR-252a | 127.8750 | 150.6875  | 139.2813  | -0.2368 | 21.2427  | 0.0014 | 0.0028 | 0.8486 |
| bte-miR-263b | 434.9688 | 522.5938  | 478.7813  | -0.2648 | 86.4417  | 0.0000 | 0.0001 | 0.8323 |
| bte-miR-3477 | 215.4688 | 261.4063  | 238.4375  | -0.2788 | 53.9310  | 0.0001 | 0.0003 | 0.8243 |
| bte-miR-6053 | 0.8438   | 1.0313    | 0.9375    | -0.2895 | 2.3180   | 0.1740 | 0.2057 | 0.8182 |
| bte-miR-750  | 412.4688 | 510.4375  | 461.4531  | -0.3074 | 72.4227  | 0.0000 | 0.0001 | 0.8081 |
| bte-mc-64    | 8.5000   | 10.5313   | 9.5156    | -0.3091 | 25.9391  | 0.0008 | 0.0017 | 0.8071 |
| bte-miR-315  | 4.4063   | 5.7188    | 5.0625    | -0.3761 | 23.5286  | 0.0011 | 0.0022 | 0.7705 |
| bte-miR-3759 | 281.9375 | 368.5625  | 325.2500  | -0.3865 | 25.5307  | 0.0008 | 0.0018 | 0.7650 |
| bte-mc-753   | 111.7500 | 148.0938  | 129.9219  | -0.4062 | 19.1376  | 0.0019 | 0.0037 | 0.7546 |
| bte-miR-927b | 2.0625   | 2.8125    | 2.4375    | -0.4475 | 4.8698   | 0.0512 | 0.0674 | 0.7333 |
| bte-miR-279a | 25.1875  | 34.5938   | 29.8906   | -0.4578 | 17.7286  | 0.0024 | 0.0044 | 0.7281 |
| bte-miR-283  | 306.3750 | 429.7500  | 368.0625  | -0.4882 | 90.2440  | 0.0000 | 0.0001 | 0.7129 |
| bte-miR-1    | 54.2188  | 76.8125   | 65.5156   | -0.5025 | 33.9036  | 0.0004 | 0.0009 | 0.7059 |
| bte-miR-193  | 3.6875   | 5.4375    | 4.5625    | -0.5603 | 15.1201  | 0.0036 | 0.0064 | 0.6782 |
| bte-mc-24    | 140.9375 | 208.2500  | 174.5938  | -0.5633 | 37.1216  | 0.0003 | 0.0007 | 0.6768 |
| bte-mc-218   | 6.9688   | 10.4063   | 8.6875    | -0.5785 | 16.1424  | 0.0030 | 0.0054 | 0.6697 |
| bte-mc-712   | 13.5313  | 21.5000   | 17.5156   | -0.6680 | 96.1909  | 0.0000 | 0.0001 | 0.6294 |
| bte-miR-11   | 77.7500  | 127.5625  | 102.6563  | -0.7143 | 68.1671  | 0.0000 | 0.0002 | 0.6095 |
| bte-miR-2944 | 33.7813  | 55.8750   | 44.8281   | -0.7260 | 11.1147  | 0.0080 | 0.0128 | 0.6046 |
| bte-miR-981  | 1.0938   | 1.9063    | 1.5000    | -0.8015 | 6.5325   | 0.0280 | 0.0386 | 0.5738 |
| bte-miR-92c  | 783.9375 | 1388.4063 | 1086.1719 | -0.8246 | 9.4271   | 0.0121 | 0.0182 | 0.5646 |
| bte-miR-33   | 0.5625   | 1.0000    | 0.7813    | -0.8301 | 2.2806   | 0.1779 | 0.2063 | 0.5625 |
| bte-mc-1607  | 0.3125   | 0.5625    | 0.4375    | -0.8480 | 1.0478   | 0.4034 | 0.4457 | 0.5556 |
| bte-miR-965  | 1.6250   | 2.9688    | 2.2969    | -0.8694 | 12.0789  | 0.0065 | 0.0106 | 0.5474 |

|               |          |          |          |         |          |        |        |        |
|---------------|----------|----------|----------|---------|----------|--------|--------|--------|
| bte-miR-92a   | 102.5625 | 194.4688 | 148.5156 | -0.9230 | 10.7648  | 0.0087 | 0.0135 | 0.5274 |
| bte-miR-6040  | 13.6563  | 26.1250  | 19.8906  | -0.9359 | 10.8447  | 0.0086 | 0.0134 | 0.5227 |
| bte-mc-1154   | 16.8438  | 32.9063  | 24.8750  | -0.9661 | 161.0136 | 0.0000 | 0.0000 | 0.5119 |
| bte-miR-9c    | 5.1875   | 11.5313  | 8.3594   | -1.1524 | 7.2878   | 0.0220 | 0.0307 | 0.4499 |
| bte-miR-6039  | 0.5625   | 1.2813   | 0.9219   | -1.1876 | 2.7089   | 0.1396 | 0.1670 | 0.4390 |
| bte-miR-3770  | 0.1563   | 0.3750   | 0.2656   | -1.2630 | 0.4617   | 0.6495 | 0.6849 | 0.4167 |
| bte-miR-1000  | 0.2188   | 0.5313   | 0.3750   | -1.2801 | 1.0983   | 0.3884 | 0.4332 | 0.4118 |
| bte-miR-3715  | 0.5000   | 2.2813   | 1.3906   | -2.1898 | 4.9902   | 0.0488 | 0.0650 | 0.2192 |
| bte-miR-279c  | 0.9063   | 4.3125   | 2.6094   | -2.2505 | 18.0663  | 0.0022 | 0.0043 | 0.2101 |
| bte-miR-3727  | 0.1563   | 0.7500   | 0.4531   | -2.2630 | 0.8779   | 0.4599 | 0.5032 | 0.2083 |
| bte-miR-6052  | 4.2500   | 23.7188  | 13.9844  | -2.4805 | 12.8539  | 0.0056 | 0.0093 | 0.1792 |
| bte-miR-929   | 0.4063   | 2.4688   | 1.4375   | -2.6033 | 1.5492   | 0.2819 | 0.3238 | 0.1646 |
| bte-mc-37     | 0.1875   | 1.2500   | 0.7188   | -2.7370 | 1.3456   | 0.3245 | 0.3655 | 0.1500 |
| bte-miR-6012  | 0.0313   | 0.3750   | 0.2031   | -3.5850 | 0.3734   | 0.7023 | 0.7339 | 0.0833 |
| bte-miR-971   | 0.0000   | 0.5938   | 0.2969   |         | 0.6136   | 0.5701 | 0.6067 | 0.0000 |
| bte-miR-6067  | 0.0000   | 0.1250   | 0.0625   |         | 0.0618   | 0.9406 | 0.9412 | 0.0000 |
| bte-miR-928   | 0.0000   | 0.1250   | 0.0625   |         | 0.0612   | 0.9412 | 0.9412 | 0.0000 |
| bte-miR-iab-4 | 0.0000   | 0.1250   | 0.0625   |         | 0.0612   | 0.9412 | 0.9412 | 0.0000 |

---

**Table S3: data of miRNAs expression (SBPV infection samples vs. Control)**

| miRNA         | Average counts        |                      | AveExpr  | log2(SBPV/PBS) | F        | P.Value | adj.P.Val | fold    |
|---------------|-----------------------|----------------------|----------|----------------|----------|---------|-----------|---------|
|               | SBPV infected samples | PBS injected samples |          |                |          |         |           |         |
| bte-miR-996   | 0.8750                | 0.0000               | 0.4375   |                | 0.9130   | 0.4474  | 0.4943    |         |
| bte-miR-980   | 0.1250                | 0.0000               | 0.0625   |                | 0.0416   | 0.9595  | 0.9678    |         |
| bte-miR-219   | 0.0000                | 0.0000               | 0.0000   |                | 0.0000   | 1.0000  | 1.0000    |         |
| bte-miR-iab-4 | 1.3438                | 0.0313               | 0.6875   | 5.4263         | 1.4588   | 0.2999  | 0.3444    | 43.0000 |
| bte-miR-928   | 0.8125                | 0.0313               | 0.4219   | 4.7004         | 0.6792   | 0.5398  | 0.5907    | 26.0000 |
| bte-miR-307   | 4.1563                | 0.3125               | 2.2344   | 3.7334         | 6.8419   | 0.0253  | 0.0354    | 13.3000 |
| bte-mc-1607   | 2.8750                | 0.4688               | 1.6719   | 2.6167         | 4.5152   | 0.0592  | 0.0754    | 6.1333  |
| bte-miR-6067  | 0.2188                | 0.0625               | 0.1406   | 1.8074         | 0.1320   | 0.8786  | 0.8940    | 3.5000  |
| bte-miR-315   | 16.6250               | 5.7813               | 11.2031  | 1.5239         | 122.4250 | 0.0000  | 0.0001    | 2.8757  |
| bte-miR-7     | 1.9063                | 0.6875               | 1.2969   | 1.4713         | 3.4847   | 0.0939  | 0.1171    | 2.7727  |
| bte-miR-282   | 1.6875                | 0.6875               | 1.1875   | 1.2955         | 4.5333   | 0.0587  | 0.0754    | 2.4545  |
| bte-miR-13b   | 142.0313              | 62.8438              | 102.4375 | 1.1764         | 31.9000  | 0.0004  | 0.0013    | 2.2601  |
| bte-miR-3730  | 8.0313                | 3.6563               | 5.8438   | 1.1353         | 18.7622  | 0.0020  | 0.0044    | 2.1966  |
| bte-miR-6001  | 3.0625                | 1.5000               | 2.2813   | 1.0297         | 2.3085   | 0.1750  | 0.2093    | 2.0417  |
| bte-miR-190   | 41.0625               | 20.2188              | 30.6406  | 1.0221         | 24.7571  | 0.0009  | 0.0023    | 2.0309  |
| bte-miR-2765  | 2.9063                | 1.5000               | 2.2031   | 0.9542         | 5.4807   | 0.0405  | 0.0539    | 1.9375  |
| bte-miR-927b  | 4.6875                | 2.5000               | 3.5938   | 0.9069         | 6.3923   | 0.0293  | 0.0400    | 1.8750  |
| bte-miR-981   | 3.5625                | 1.9063               | 2.7344   | 0.9022         | 2.5311   | 0.1541  | 0.1862    | 1.8689  |
| bte-miR-927a  | 166.5625              | 95.1250              | 130.8438 | 0.8082         | 15.6298  | 0.0033  | 0.0066    | 1.7510  |
| bte-mc-753    | 245.5000              | 152.8750             | 199.1875 | 0.6834         | 12.1820  | 0.0064  | 0.0116    | 1.6059  |



|               |           |           |           |        |          |        |        |        |
|---------------|-----------|-----------|-----------|--------|----------|--------|--------|--------|
| bte-miR-277   | 2291.4688 | 1433.4375 | 1862.4531 | 0.6768 | 106.4015 | 0.0000 | 0.0001 | 1.5986 |
| bte-miR-263b  | 705.6250  | 459.0938  | 582.3594  | 0.6201 | 29.7817  | 0.0005 | 0.0015 | 1.5370 |
| bte-miR-279b  | 16.9063   | 11.2188   | 14.0625   | 0.5916 | 6.7665   | 0.0259 | 0.0358 | 1.5070 |
| bte-bantam    | 175.2500  | 117.4688  | 146.3594  | 0.5771 | 129.4557 | 0.0000 | 0.0001 | 1.4919 |
| bte-miR-2944  | 69.8750   | 47.0000   | 58.4375   | 0.5721 | 9.3318   | 0.0124 | 0.0194 | 1.4867 |
| bte-miR-6000a | 23.9375   | 16.3438   | 20.1406   | 0.5505 | 9.8457   | 0.0109 | 0.0179 | 1.4646 |
| bte-miR-29b   | 5.6563    | 3.9063    | 4.7813    | 0.5341 | 10.3998  | 0.0095 | 0.0160 | 1.4480 |
| bte-miR-6037  | 14.5000   | 10.4063   | 12.4531   | 0.4786 | 15.7244  | 0.0033 | 0.0066 | 1.3934 |
| bte-miR-993   | 12.9063   | 9.3125    | 11.1094   | 0.4708 | 8.2325   | 0.0166 | 0.0248 | 1.3859 |
| bte-miR-1175  | 79.1875   | 57.4688   | 68.3281   | 0.4625 | 21.1000  | 0.0015 | 0.0033 | 1.3779 |
| bte-miR-33    | 1.3750    | 1.0000    | 1.1875    | 0.4594 | 5.1513   | 0.0458 | 0.0604 | 1.3750 |
| bte-miR-9a    | 220.2188  | 161.9375  | 191.0781  | 0.4435 | 200.2784 | 0.0000 | 0.0001 | 1.3599 |
| bte-mc-485    | 25.2813   | 18.8125   | 22.0469   | 0.4264 | 11.2272  | 0.0079 | 0.0140 | 1.3439 |
| bte-miR-137   | 5.0313    | 3.7500    | 4.3906    | 0.4240 | 7.2445   | 0.0223 | 0.0319 | 1.3417 |
| bte-miR-31a   | 179.2500  | 135.5000  | 157.3750  | 0.4037 | 22.7842  | 0.0012 | 0.0028 | 1.3229 |
| bte-miR-6040  | 32.9375   | 25.6250   | 29.2813   | 0.3622 | 9.8083   | 0.0110 | 0.0179 | 1.2854 |
| bte-miR-263a  | 683.7500  | 541.8750  | 612.8125  | 0.3355 | 15.0338  | 0.0037 | 0.0072 | 1.2618 |
| bte-miR-10    | 5238.0000 | 4173.1875 | 4705.5938 | 0.3279 | 124.2695 | 0.0000 | 0.0001 | 1.2552 |
| bte-miR-79    | 6.2813    | 5.0625    | 5.6719    | 0.3112 | 7.7959   | 0.0189 | 0.0277 | 1.2407 |
| bte-miR-750   | 566.6563  | 464.0625  | 515.3594  | 0.2882 | 83.3454  | 0.0000 | 0.0003 | 1.2211 |
| bte-miR-278   | 193.5938  | 161.6250  | 177.6094  | 0.2604 | 61.7734  | 0.0001 | 0.0004 | 1.1978 |
| bte-mc-218    | 12.4375   | 10.6250   | 11.5313   | 0.2272 | 23.5534  | 0.0011 | 0.0026 | 1.1706 |
| bte-mc-762    | 35.1250   | 30.4688   | 32.7969   | 0.2052 | 41.5781  | 0.0002 | 0.0008 | 1.1528 |
| bte-mc-1030   | 1749.1250 | 1525.2813 | 1637.2031 | 0.1976 | 9.5977   | 0.0116 | 0.0186 | 1.1468 |
| bte-miR-305   | 332.1250  | 289.7813  | 310.9531  | 0.1968 | 39.5032  | 0.0002 | 0.0008 | 1.1461 |

|              |           |           |           |         |          |        |        |        |
|--------------|-----------|-----------|-----------|---------|----------|--------|--------|--------|
| bte-miR-87   | 115.9375  | 103.9063  | 109.9219  | 0.1581  | 24.5009  | 0.0010 | 0.0024 | 1.1158 |
| bte-miR-14   | 3180.3125 | 2855.5000 | 3017.9063 | 0.1554  | 281.4848 | 0.0000 | 0.0000 | 1.1137 |
| bte-miR-3719 | 0.6563    | 0.5938    | 0.6250    | 0.1444  | 1.0955   | 0.3892 | 0.4383 | 1.1053 |
| bte-miR-306  | 182.4375  | 165.6875  | 174.0625  | 0.1389  | 62.1539  | 0.0001 | 0.0004 | 1.1011 |
| bte-miR-8    | 775.0625  | 727.6875  | 751.3750  | 0.0910  | 273.5957 | 0.0000 | 0.0000 | 1.0651 |
| bte-miR-92b  | 305.5000  | 288.4688  | 296.9844  | 0.0828  | 57.7994  | 0.0001 | 0.0004 | 1.0590 |
| bte-miR-2788 | 11.9688   | 11.3125   | 11.6406   | 0.0814  | 12.2168  | 0.0063 | 0.0116 | 1.0580 |
| bte-miR-279a | 33.5625   | 32.0000   | 32.7813   | 0.0688  | 30.8979  | 0.0005 | 0.0013 | 1.0488 |
| bte-miR-13a  | 88.5313   | 85.8438   | 87.1875   | 0.0445  | 37.3626  | 0.0003 | 0.0009 | 1.0313 |
| bte-miR-275  | 786.5625  | 769.0000  | 777.7813  | 0.0326  | 69.2319  | 0.0000 | 0.0003 | 1.0228 |
| bte-miR-283  | 393.5313  | 388.7500  | 391.1406  | 0.0176  | 141.1461 | 0.0000 | 0.0001 | 1.0123 |
| bte-miR-2-2  | 66.4375   | 65.8438   | 66.1406   | 0.0130  | 47.2105  | 0.0001 | 0.0006 | 1.0090 |
| bte-miR-3477 | 260.4375  | 259.5313  | 259.9844  | 0.0050  | 42.7109  | 0.0002 | 0.0007 | 1.0035 |
| bte-miR-932  | 0.2813    | 0.2813    | 0.2813    | 0.0000  | 0.3118   | 0.7426 | 0.7757 | 1.0000 |
| bte-miR-34   | 1081.1563 | 1103.0313 | 1092.0938 | -0.0289 | 46.4460  | 0.0001 | 0.0006 | 0.9802 |
| bte-mc-732   | 1.1250    | 1.1563    | 1.1406    | -0.0395 | 3.1454   | 0.1110 | 0.1370 | 0.9730 |
| bte-miR-125  | 272.4063  | 280.4063  | 276.4063  | -0.0418 | 61.3146  | 0.0001 | 0.0004 | 0.9715 |
| bte-miR-252b | 35.7188   | 37.0000   | 36.3594   | -0.0508 | 44.7600  | 0.0002 | 0.0007 | 0.9654 |
| bte-miR-1    | 65.3438   | 67.7500   | 66.5469   | -0.0522 | 17.4173  | 0.0025 | 0.0052 | 0.9645 |
| bte-miR-375  | 295.1563  | 306.0938  | 300.6250  | -0.0525 | 36.1381  | 0.0003 | 0.0010 | 0.9643 |
| bte-miR-3049 | 11.7188   | 12.1875   | 11.9531   | -0.0566 | 5.0310   | 0.0480 | 0.0626 | 0.9615 |
| bte-miR-3791 | 50.2813   | 52.3750   | 51.3281   | -0.0589 | 7.2420   | 0.0223 | 0.0319 | 0.9600 |
| bte-miR-281  | 514.2500  | 541.8750  | 528.0625  | -0.0755 | 149.9479 | 0.0000 | 0.0001 | 0.9490 |
| bte-miR-12   | 89.5625   | 97.4375   | 93.5000   | -0.1216 | 59.1273  | 0.0001 | 0.0004 | 0.9192 |
| bte-miR-133  | 493.0313  | 539.5000  | 516.2656  | -0.1299 | 58.3084  | 0.0001 | 0.0004 | 0.9139 |
| bte-miR-     | 585.7188  | 641.9063  | 613.8125  | -0.1322 | 43.5025  | 0.0002 | 0.0007 | 0.9125 |

3785

|               |           |           |           |         |          |        |        |        |
|---------------|-----------|-----------|-----------|---------|----------|--------|--------|--------|
| bte-mc-64     | 9.6563    | 10.5938   | 10.1250   | -0.1337 | 12.8222  | 0.0056 | 0.0108 | 0.9115 |
| bte-miR-318   | 16.7813   | 18.8125   | 17.7969   | -0.1648 | 5.5525   | 0.0394 | 0.0531 | 0.8920 |
| bte-miR-92c   | 1182.0000 | 1347.1875 | 1264.5938 | -0.1887 | 8.7049   | 0.0146 | 0.0223 | 0.8774 |
| bte-miR-2-1   | 46.5938   | 53.4375   | 50.0156   | -0.1977 | 31.2393  | 0.0005 | 0.0013 | 0.8719 |
| bte-miR-2796  | 269.1875  | 310.1250  | 289.6563  | -0.2042 | 38.3590  | 0.0003 | 0.0009 | 0.8680 |
| bte-miR-2-3   | 58.5625   | 67.8438   | 63.2031   | -0.2122 | 38.3221  | 0.0003 | 0.0009 | 0.8632 |
| bte-miR-3786  | 25.7500   | 29.9375   | 27.8438   | -0.2174 | 33.3117  | 0.0004 | 0.0012 | 0.8601 |
| bte-miR-100   | 1101.6875 | 1290.4688 | 1196.0781 | -0.2282 | 73.7313  | 0.0000 | 0.0003 | 0.8537 |
| bte-miR-965   | 2.3438    | 2.7500    | 2.5469    | -0.2306 | 8.2373   | 0.0166 | 0.0248 | 0.8523 |
| bte-miR-184   | 2855.5000 | 3354.1250 | 3104.8125 | -0.2322 | 43.0768  | 0.0002 | 0.0007 | 0.8513 |
| bte-let-7     | 46.0938   | 55.6563   | 50.8750   | -0.2720 | 70.8976  | 0.0000 | 0.0003 | 0.8282 |
| bte-miR-210   | 24.8438   | 30.1563   | 27.5000   | -0.2796 | 12.5013  | 0.0060 | 0.0113 | 0.8238 |
| bte-miR-317   | 732.0313  | 892.1250  | 812.0781  | -0.2853 | 56.6147  | 0.0001 | 0.0004 | 0.8205 |
| bte-mc-65     | 62.4688   | 77.3125   | 69.8906   | -0.3076 | 15.7752  | 0.0032 | 0.0066 | 0.8080 |
| bte-miR-3726  | 7.6875    | 9.5313    | 8.6094    | -0.3102 | 3.0359   | 0.1174 | 0.1434 | 0.8066 |
| bte-mc1154    | 26.5938   | 33.2500   | 29.9219   | -0.3223 | 132.7131 | 0.0000 | 0.0001 | 0.7998 |
| bte-miR-252a  | 110.0000  | 141.3750  | 125.6875  | -0.3620 | 18.3134  | 0.0022 | 0.0046 | 0.7781 |
| bte-miR-316   | 112.5313  | 157.0938  | 134.8125  | -0.4813 | 26.8605  | 0.0007 | 0.0019 | 0.7163 |
| bte-miR-3770  | 0.2188    | 0.3125    | 0.2656    | -0.5146 | 0.3024   | 0.7490 | 0.7757 | 0.7000 |
| bte-miR-71    | 17.7500   | 26.4375   | 22.0938   | -0.5748 | 10.5643  | 0.0091 | 0.0156 | 0.6714 |
| bte-miR-276   | 2391.3750 | 3574.6563 | 2983.0156 | -0.5800 | 54.6232  | 0.0001 | 0.0004 | 0.6690 |
| bte-miR-3718a | 1291.7188 | 1968.5000 | 1630.1094 | -0.6078 | 79.1146  | 0.0000 | 0.0003 | 0.6562 |
| bte-miR-9c    | 7.3750    | 11.8750   | 9.6250    | -0.6872 | 6.9618   | 0.0243 | 0.0344 | 0.6211 |
| bte-mc-314    | 7.1875    | 11.6250   | 9.4063    | -0.6937 | 9.1731   | 0.0129 | 0.0199 | 0.6183 |
| bte-mc-712    | 13.3125   | 22.9688   | 18.1406   | -0.7869 | 50.6092  | 0.0001 | 0.0005 | 0.5796 |
| bte-miR-      | 13.8125   | 23.9688   | 18.8906   | -0.7952 | 10.8327  | 0.0086 | 0.0149 | 0.5763 |

6052

|              |          |          |          |         |         |        |        |        |
|--------------|----------|----------|----------|---------|---------|--------|--------|--------|
| bte-miR-3759 | 194.2813 | 341.4375 | 267.8594 | -0.8135 | 34.5980 | 0.0003 | 0.0011 | 0.5690 |
| bte-miR-279c | 2.3750   | 4.1875   | 3.2813   | -0.8182 | 22.0791 | 0.0013 | 0.0030 | 0.5672 |
| bte-miR-11   | 69.1875  | 124.4688 | 96.8281  | -0.8472 | 39.2298 | 0.0002 | 0.0008 | 0.5559 |
| bte-miR-1000 | 0.1875   | 0.3438   | 0.2656   | -0.8745 | 0.3750  | 0.7013 | 0.7463 | 0.5455 |
| bte-miR-92a  | 105.4375 | 198.4375 | 151.9375 | -0.9123 | 10.8555 | 0.0085 | 0.0149 | 0.5313 |
| bte-miR-124  | 2.3125   | 4.5313   | 3.4219   | -0.9705 | 20.3761 | 0.0016 | 0.0036 | 0.5103 |
| bte-mc-295   | 4.0313   | 8.0938   | 6.0625   | -1.0056 | 12.4397 | 0.0061 | 0.0113 | 0.4981 |
| bte-mc-24    | 90.7813  | 205.9375 | 148.3594 | -1.1817 | 29.4330 | 0.0006 | 0.0015 | 0.4408 |
| bte-mc-476   | 0.3438   | 0.8438   | 0.5938   | -1.2955 | 1.5068  | 0.2902 | 0.3366 | 0.4074 |
| bte-miR-3715 | 0.7188   | 2.1563   | 1.4375   | -1.5850 | 3.8559  | 0.0789 | 0.0995 | 0.3333 |
| bte-miR-6053 | 0.2813   | 0.9688   | 0.6250   | -1.7843 | 1.5263  | 0.2864 | 0.3355 | 0.2903 |
| bte-miR-6039 | 0.3125   | 1.2188   | 0.7656   | -1.9635 | 1.9677  | 0.2149 | 0.2544 | 0.2564 |
| bte-mc-37    | 0.2188   | 1.1563   | 0.6875   | -2.4021 | 1.0662  | 0.3979 | 0.4438 | 0.1892 |
| bte-miR-193  | 0.5938   | 5.5625   | 3.0781   | -3.2278 | 9.3626  | 0.0123 | 0.0194 | 0.1067 |
| bte-miR-3727 | 0.0313   | 0.6875   | 0.3594   | -4.4594 | 0.5923  | 0.5805 | 0.6293 | 0.0455 |
| bte-miR-929  | 0.0000   | 2.3438   | 1.1719   |         | 1.2814  | 0.3397 | 0.3864 | 0.0000 |
| bte-miR-971  | 0.0000   | 0.5938   | 0.2969   |         | 0.5128  | 0.6212 | 0.6673 | 0.0000 |
| bte-miR-6012 | 0.0000   | 0.4063   | 0.2031   |         | 0.3212  | 0.7362 | 0.7757 | 0.0000 |
| bte-miR-6065 | 0.0000   | 0.3125   | 0.1563   |         | 0.2497  | 0.7862 | 0.8071 | 0.0000 |

---

**Table S4: Specific primers to detect miRNA expression by RT-qPCR.**

| microRNA    | specific primer          | amplification efficiency |
|-------------|--------------------------|--------------------------|
| bte-mir-13b | TATCACAGCCATTTTTGACGATT  | 1.992                    |
| bte-mc-24   | TGTGGGGCGGCGTCCGGGTCCT   | 2.092                    |
| bte-mir-184 | TGGACGGAGAACTGATAAGG     | 2.076                    |
| bte-mir-14  | GGGGGTGAGAACTGGCTTGGCT   | 2.076                    |
| bte-mir-100 | AACCCGTAGATCCGAACTTGTG   | 2.011                    |
| bte-mir-87  | GTGAGCAAAGTTTCAGGTGTGT   | 2.009                    |
| bte-mir-34  | TGGCAGTGTTGTTAGCTGGTTGTG | 2.017                    |
| bte-mir-281 | AAGAGAGCTATCCATCGACAGT   | 2.057                    |

**Table S5: Other primers used in this study**

| Gene                             | Forward primer                                  | Reverse Primer                                        | Amplification efficiency (AE) | NCBI accession number | reference                 |
|----------------------------------|-------------------------------------------------|-------------------------------------------------------|-------------------------------|-----------------------|---------------------------|
| PPIA (qPCR)                      | TCGTAATGGAGTTGAGGAGTGA                          | CTTGGCACATGAAGTTTGGAA<br>T                            | 1.988                         | XM_003402218.2        | (Niu et al., 2014)        |
| RPL23 (qPCR)                     | GGGAAAACCTGAACTTAGGAAA<br>A                     | ACCCTTTCATTTCTCCCTTGTT<br>A                           | 1.985                         | XM_003400707.2        | (Niu et al., 2014)        |
| IAPV (amply partial genome)      | CACCAATCACGGACCTCACA                            | ACAGTGTTAGCTGCAGGACA                                  |                               | EU436443.1            |                           |
| IAPV (qPCR)                      | CCATGCCTGGCGATTAC                               | CTGAATAATACTGTGCGTATC                                 |                               | EU436443.1            | (de Miranda et al., 2010) |
| SBPV (amply partial genome)      | CCAGGATCGCATCCCCTTAG                            | TGTTGTCTCCCACCTCATGC                                  |                               | GU938761.1            |                           |
| SBPV (qPCR)                      | TCCAAGAGCAAGTATGCGGG                            | AGCATCAAAGCTAATTGCGGA                                 |                               | GU938761.1            |                           |
| <i>dicer-1</i> (qPCR)            | AGAGGAACAAATTTCAAATGAC<br>GA                    | CTGATTCACACGCAGGGGAT                                  | 1.931                         | XM_003401907.2        |                           |
| <i>dicer-1</i> (dsRNA synthesis) | TAATACGACTCACTATAGGGAG<br>ATTGGTCAAGCGACATGGCAA | TAATACGACTCACTATAGGGA<br>GAAATGAGCTTGTCTATGCTT<br>CGT |                               | XM_003401907.2        |                           |
| <i>ago-1</i> (qPCR)              | AGTAGTGGGGTCTTTCTCGC                            | TGCTCGCACTTATTTTACAATG<br>ACA                         | 2.069                         | XM_012315499.1        |                           |

de Miranda, J.R., Cordoni, G., Budge, G., 2010. The Acute bee paralysis virus–Kashmir bee virus–Israeli acute paralysis virus complex. *J. Invertebr. Pathol.* 103, Supplement, S30-S47.

Niu, J., Cappelle, K., de Miranda, J.R., Smaghe, G., Meeus, I., 2014. Analysis of reference gene stability after Israeli acute paralysis virus infection in bumblebees *Bombus terrestris*. *J. Invertebr. Pathol.* 115, 76-79.

**Figure S1: Melt curves of miRNA primers by RT-qPCR performed in all samples.**

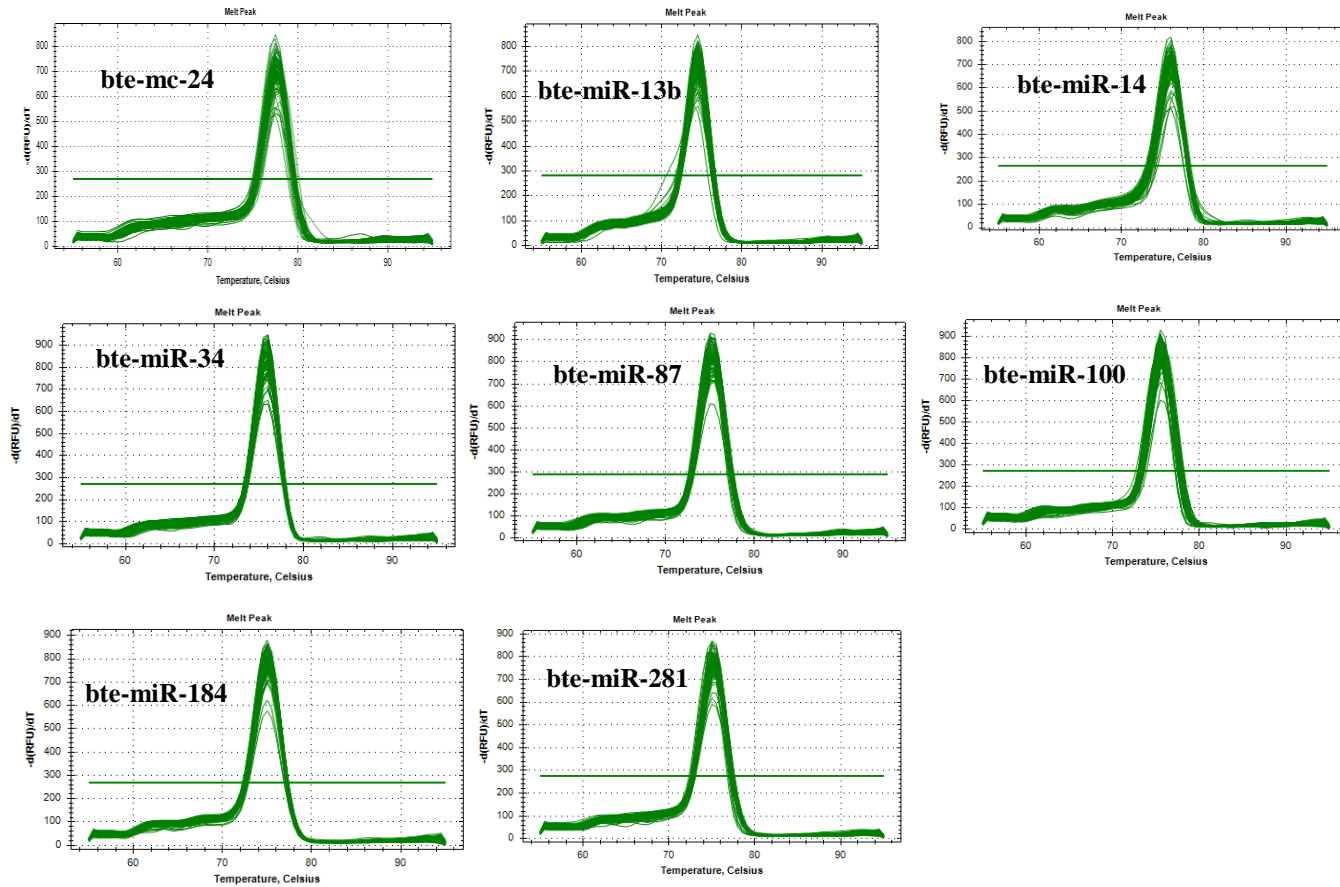

**Figure S2: The enrichment of Gene Ontology (GO) terms and Kyoto Encyclopedia of Genes and Genomes (KEGG) pathways of predicted targets of differentially expressed miRNAs by SBPV infection.** For each miRNA, a maximum of 25 predicted targets (folding energy cut-off: -20 Kcal/mol) was used as input to ClueGO. The GO and KEGG presented in the figure were based on Kappa score higher than 0.4.

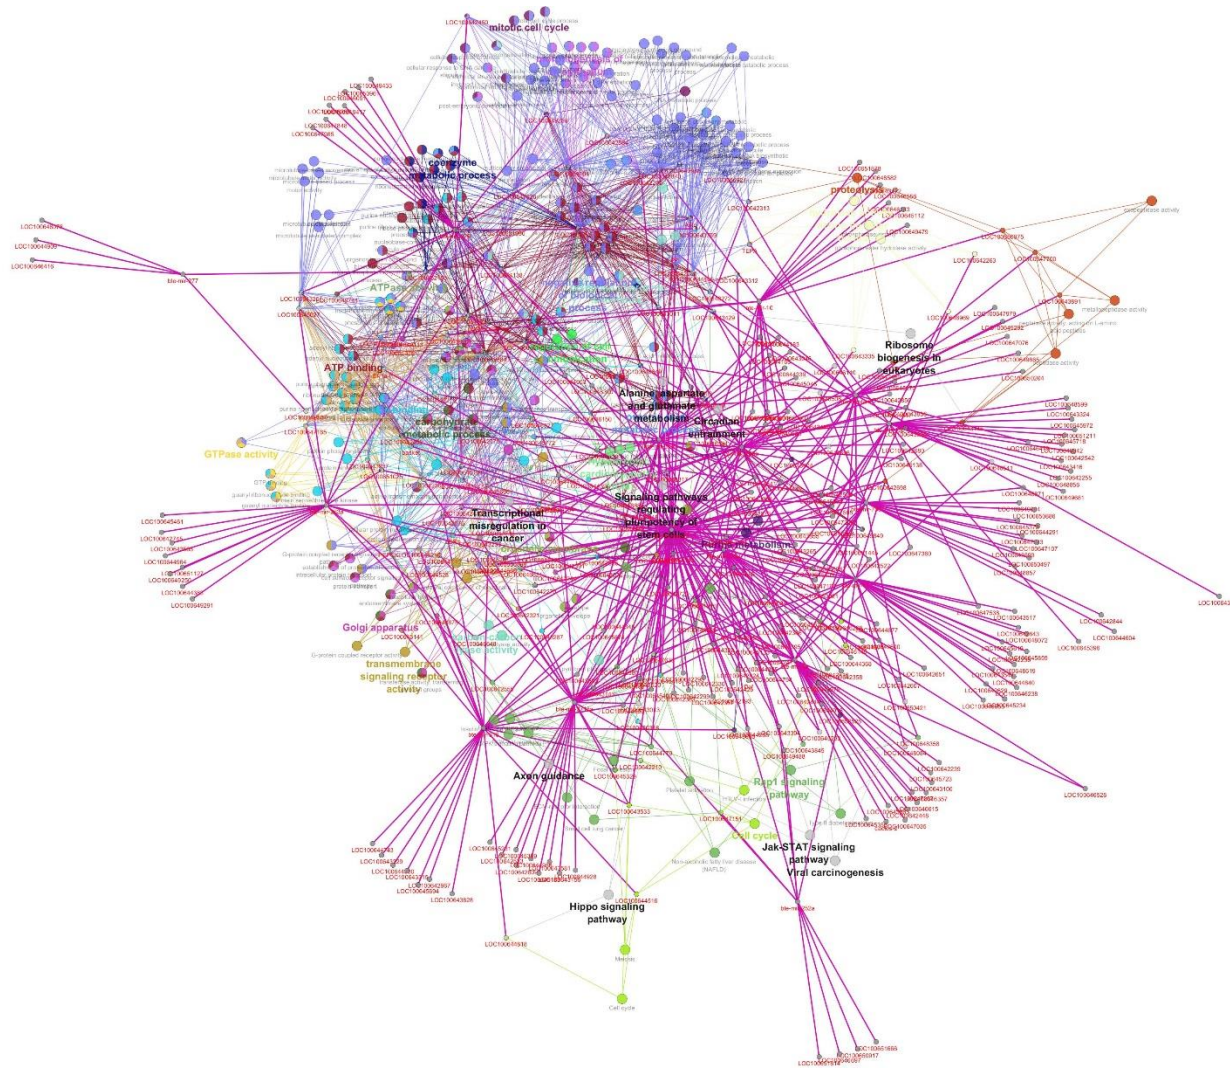



**Figure S3: The enrichment of Gene Ontology (GO) terms and Kyoto Encyclopedia of Genes and Genomes (KEGG) pathways of predicted targets of differentially expressed miRNAs by IAPV infection.** For each miRNA, a maximum of 25 predicted targets (folding energy cut-off: -20 Kcal/mol) was used as input to ClueGO. The GO and KEGG presented in the figure were based on Kappa score higher than 0.4.

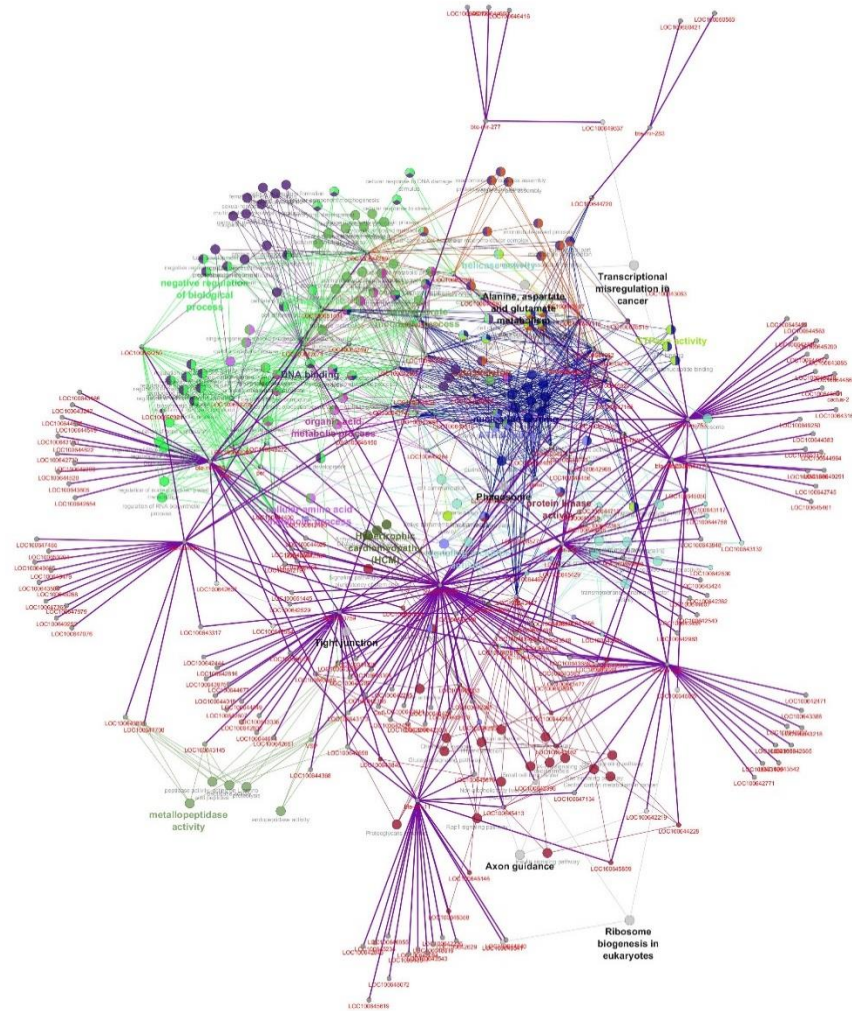

Supplement: srep45620-s1.pdf [file srep45620-s1.pdf]
